# Supplementary material for: Genomic epidemiology of SARS-CoV-2 in Pakistan
Source: bioRxiv or medRxiv preprint supplement (doi:10.1101/2021.06.24.21255875), 2021-07-02

# Supplementary Fig.1

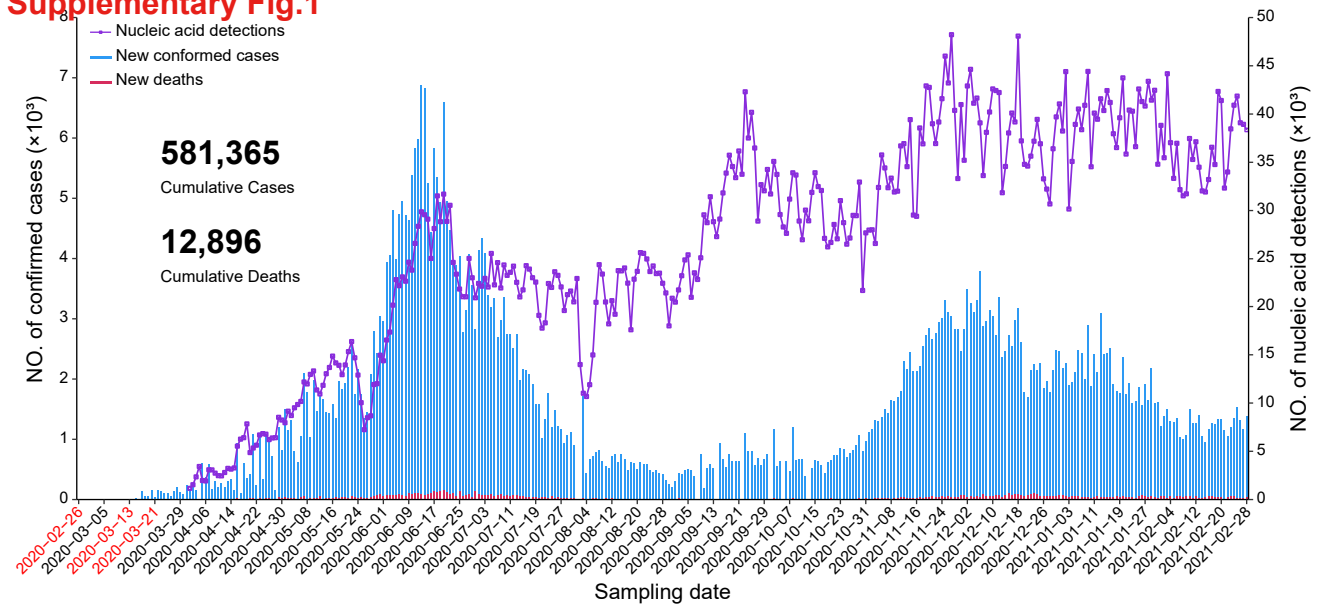

# a

## Supplementary Fig.2

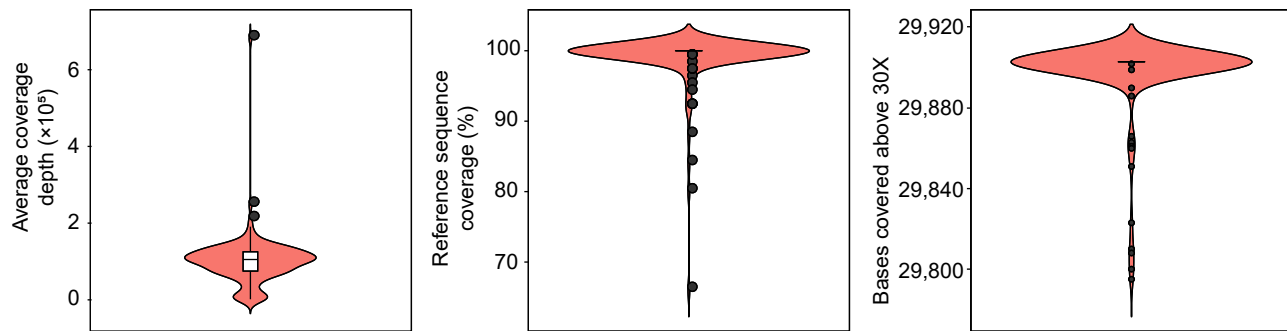

# b

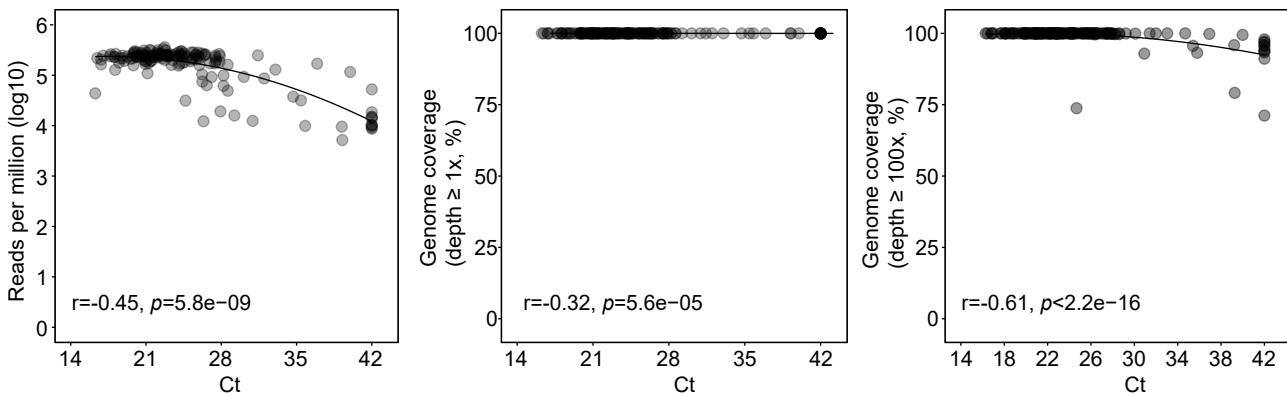

# c

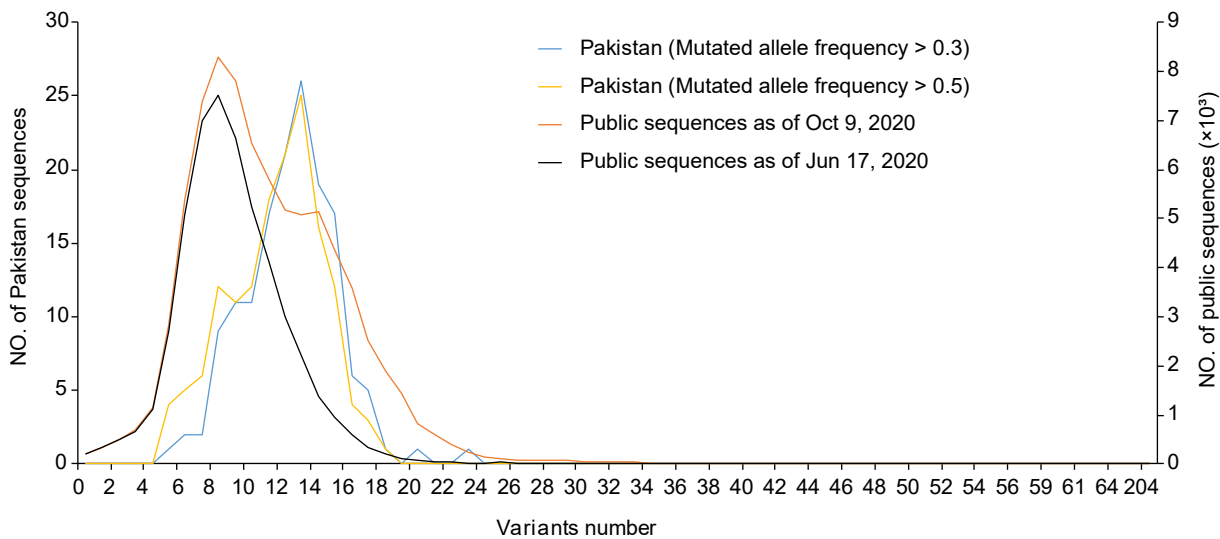

# Supplementary Fig.3

a

Public (2,135)  
Pakistan (164)

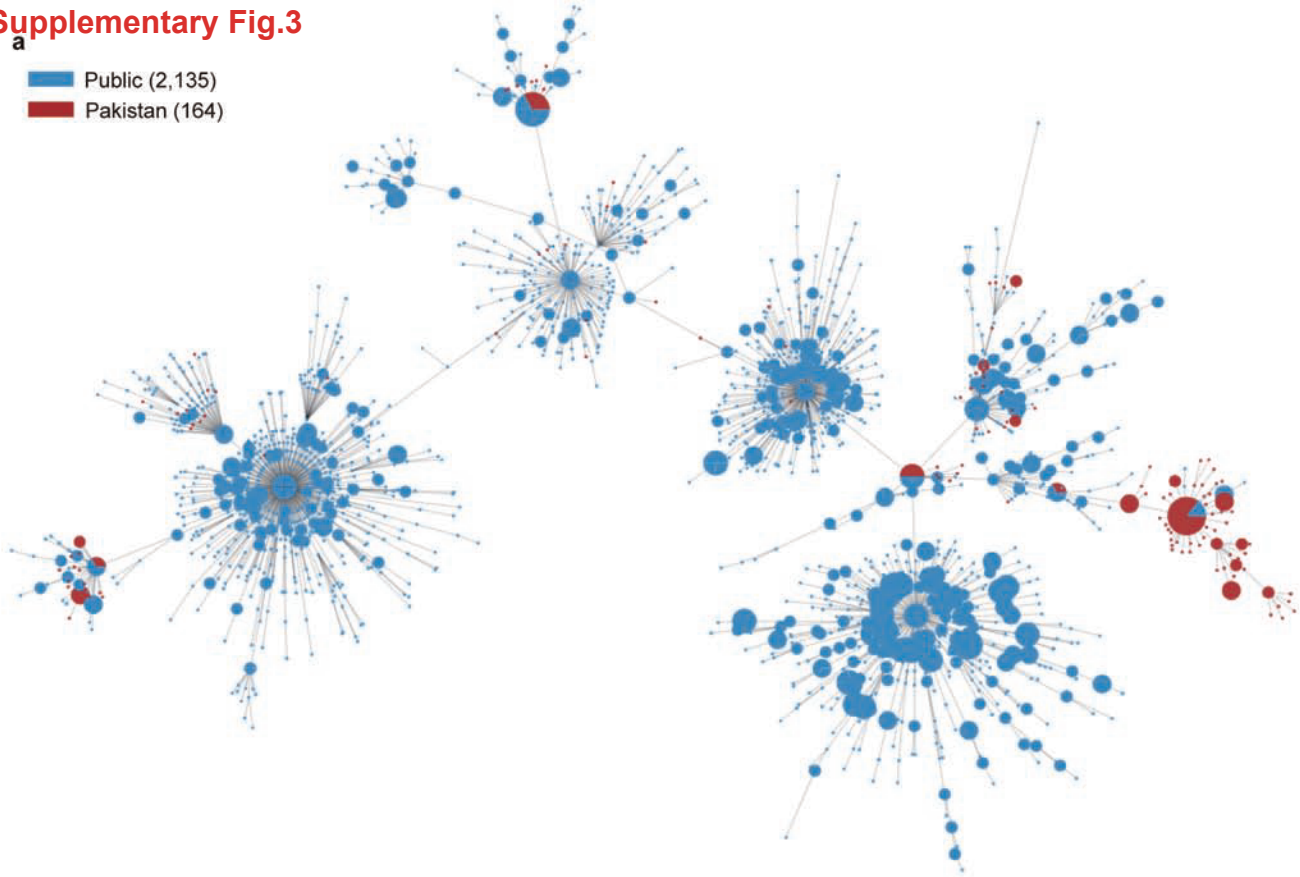

b

Tree scale: 0.0001  
Pakistan (164)  
Public (2,135)

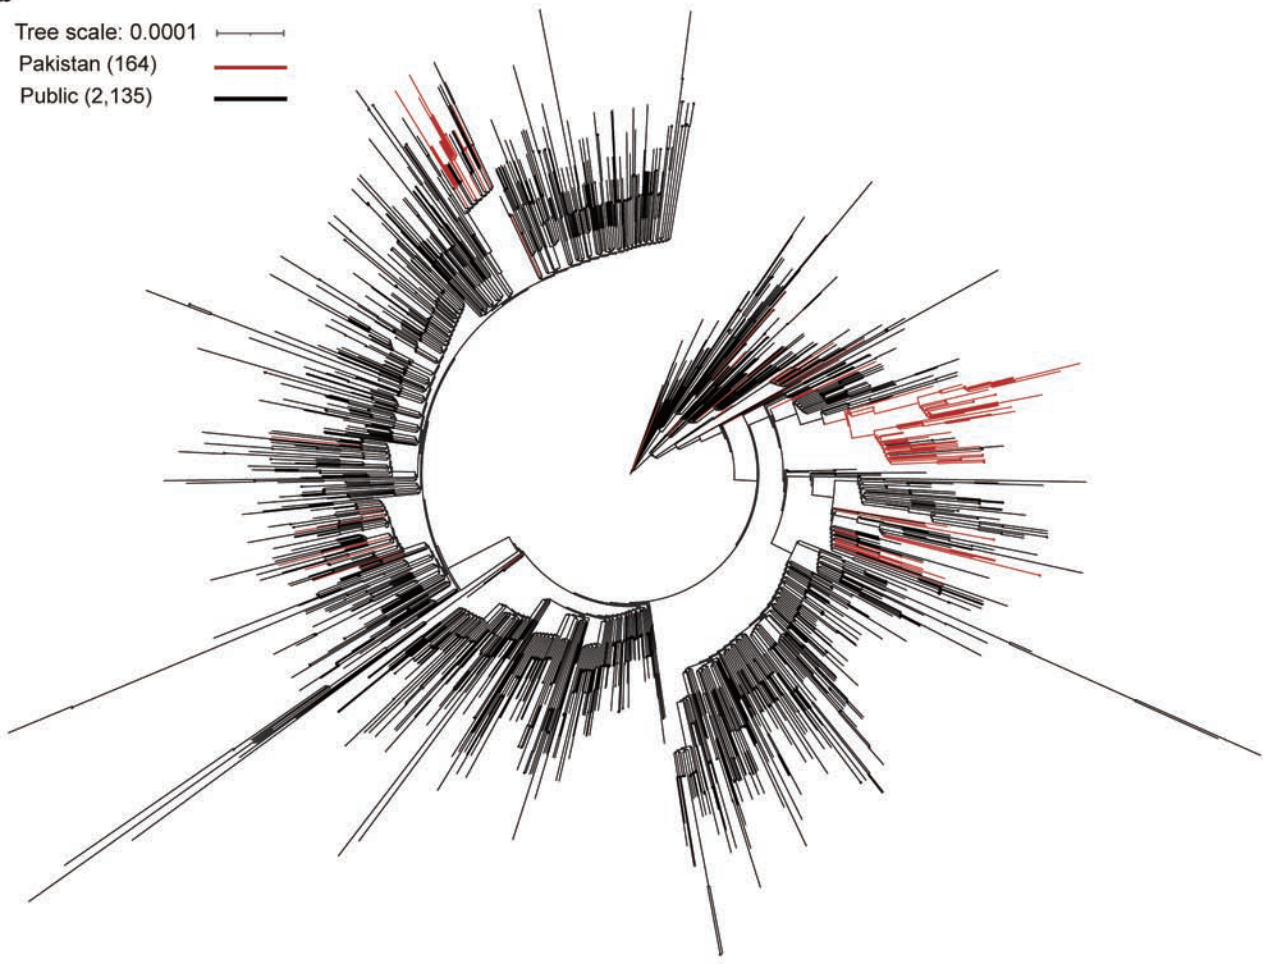

Supplementary Fig.4

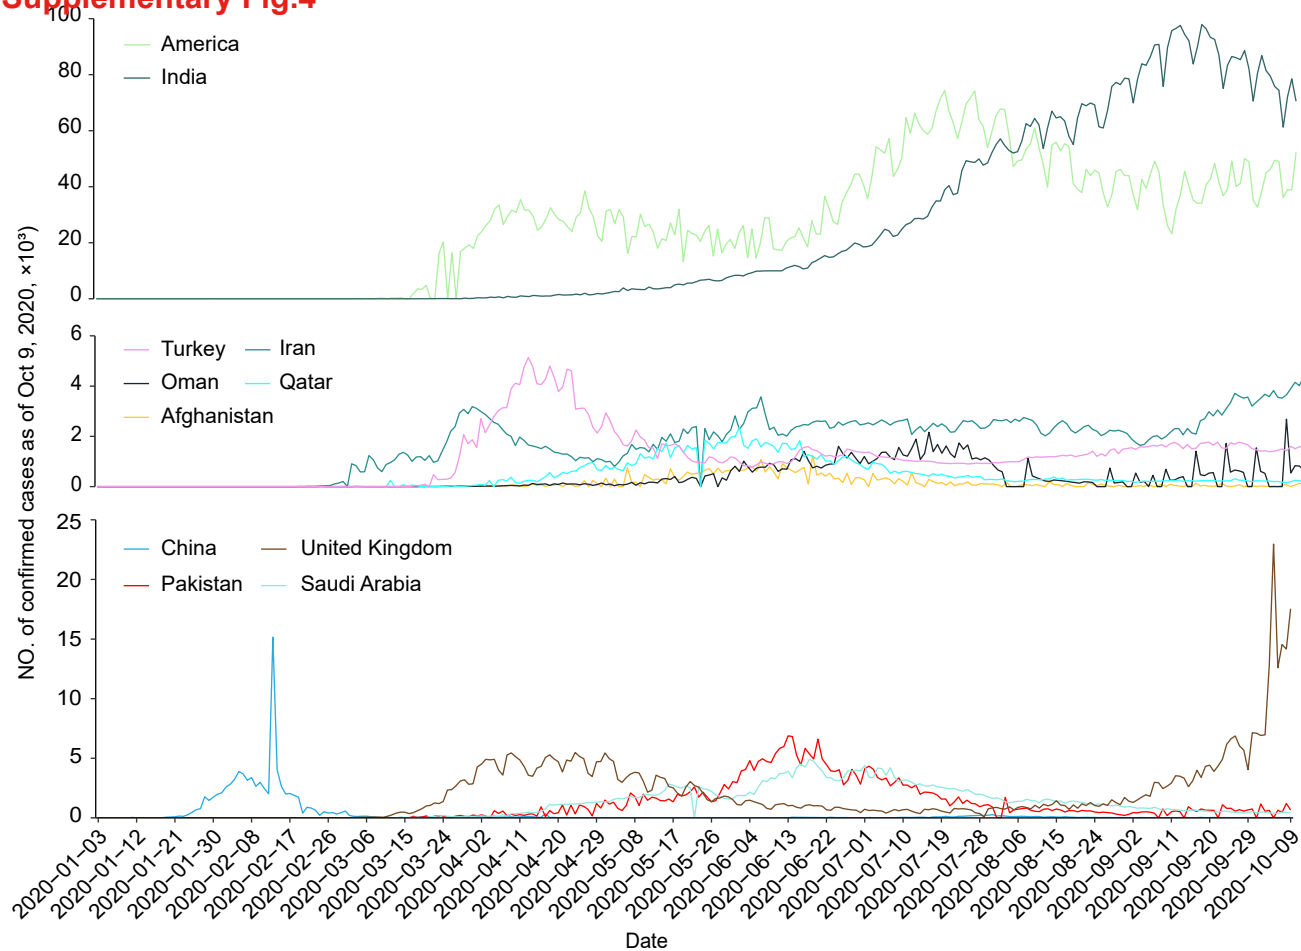

**a** Supplementary Fig.5

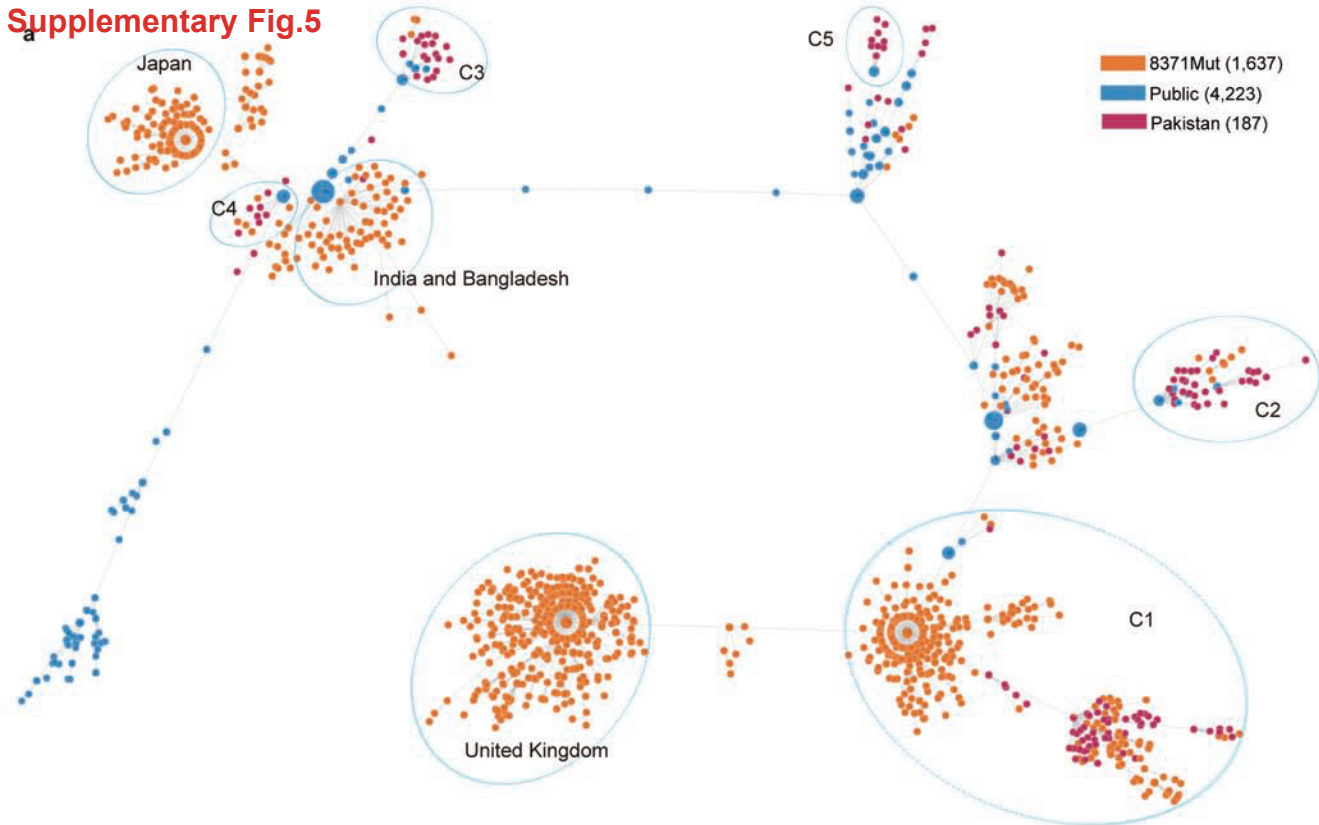

**b**

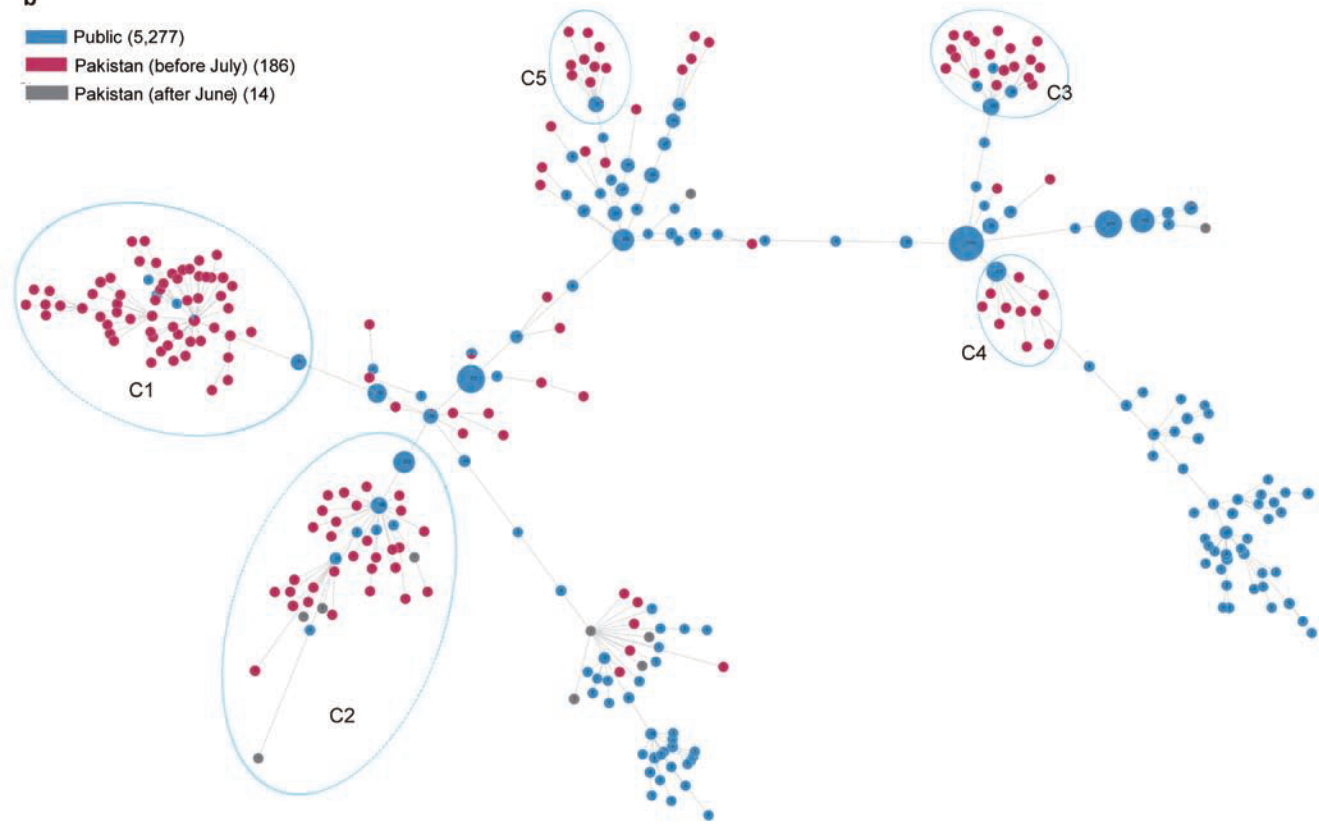

Supplement: Supplementary file [file media-1.pdf]
